# Supplementary material for: Individual Tree Structural Parameter Extraction and Volume Table Creation Based on Near-Field LiDAR Data: A Case Study in a Subtropical Planted Forest
Source: MDPI journal article supplement (doi:10.3390/s21238162), 2021-12-06
Supplement: s1 [file s1]

# Supplementary Materials

**Table S1.** Dawn redwood standard volume table compiled by standard volume equation.

| DBH<br>(cm) | H (m)<br>V (m <sup>3</sup> ) | 1      | 2      | 3      | 4      | 5      | 6      | 7      | 8      | 9      | 10     |
|-------------|------------------------------|--------|--------|--------|--------|--------|--------|--------|--------|--------|--------|
|             |                              |        |        |        |        |        |        |        |        |        |        |
| 5           |                              | 0.0004 | 0.0009 | 0.0014 | 0.0020 | 0.0025 | 0.0031 | 0.0037 | 0.0044 | 0.0050 | 0.0056 |
|             | 1                            | 1      | 4      | 0      | 8      | 8      | 9      | 1      | 4      | 8      |        |
| 6           |                              | 0.0005 | 0.0012 | 0.0020 | 0.0028 | 0.0036 | 0.0044 | 0.0053 | 0.0062 | 0.0071 | 0.0080 |
|             | 8                            | 9      | 4      | 3      | 5      | 9      | 5      | 3      | 3      | 4      |        |
| 7           |                              | 0.0007 | 0.0017 | 0.0027 | 0.0038 | 0.0048 | 0.0060 | 0.0071 | 0.0083 | 0.0095 | 0.0107 |
|             | 8                            | 2      | 4      | 0      | 9      | 2      | 8      | 5      | 5      | 7      |        |
| 8           |                              | 0.0010 | 0.0022 | 0.0035 | 0.0048 | 0.0063 | 0.0077 | 0.0092 | 0.0107 | 0.0123 | 0.0138 |
|             | 1                            | 2      | 3      | 9      | 1      | 6      | 5      | 7      | 1      | 8      |        |
| 9           |                              | 0.0012 | 0.0027 | 0.0044 | 0.0061 | 0.0078 | 0.0097 | 0.0115 | 0.0134 | 0.0154 | 0.0173 |
|             | 6                            | 8      | 1      | 2      | 9      | 1      | 7      | 7      | 0      | 6      |        |
| 10          |                              | 0.0015 | 0.0034 | 0.0053 | 0.0074 | 0.0096 | 0.0118 | 0.0141 | 0.0164 | 0.0188 | 0.0212 |
|             | 4                            | 0      | 9      | 8      | 4      | 6      | 3      | 5      | 1      | 1      |        |
| 11          |                              | 0.0018 | 0.0040 | 0.0064 | 0.0089 | 0.0115 | 0.0142 | 0.0169 | 0.0197 | 0.0225 | 0.0254 |
|             | 5                            | 7      | 6      | 6      | 5      | 1      | 4      | 2      | 5      | 2      |        |
| 12          |                              | 0.0021 | 0.0048 | 0.0076 | 0.0105 | 0.0136 | 0.0167 | 0.0199 | 0.0232 | 0.0266 | 0.0299 |
|             | 8                            | 0      | 2      | 7      | 3      | 7      | 8      | 6      | 0      | 9      |        |
| 13          |                              | 0.0025 | 0.0055 | 0.0088 | 0.0123 | 0.0158 | 0.0195 | 0.0232 | 0.0270 | 0.0309 | 0.0349 |
|             | 4                            | 9      | 7      | 1      | 6      | 2      | 7      | 8      | 7      | 1      |        |
| 14          |                              | 0.0029 | 0.0064 | 0.0102 | 0.0141 | 0.0182 | 0.0224 | 0.0267 | 0.0311 | 0.0356 | 0.0401 |
|             | 3                            | 4      | 1      | 7      | 6      | 7      | 8      | 8      | 5      | 9      |        |
| 15          |                              | 0.0033 | 0.0073 | 0.0116 | 0.0161 | 0.0208 | 0.0256 | 0.0305 | 0.0355 | 0.0406 | 0.0458 |
|             | 3                            | 4      | 4      | 5      | 2      | 2      | 4      | 5      | 5      | 2      |        |
| 16          |                              | 0.0037 | 0.0083 | 0.0131 | 0.0182 | 0.0235 | 0.0289 | 0.0345 | 0.0401 | 0.0459 | 0.0518 |
|             | 7                            | 0      | 6      | 6      | 4      | 7      | 2      | 8      | 5      | 0      |        |
| 17          |                              | 0.0042 | 0.0093 | 0.0147 | 0.0204 | 0.0264 | 0.0325 | 0.0387 | 0.0450 | 0.0515 | 0.0581 |
|             | 3                            | 1      | 7      | 9      | 1      | 0      | 3      | 9      | 6      | 3      |        |
| 18          |                              | 0.0047 | 0.0103 | 0.0164 | 0.0228 | 0.0294 | 0.0362 | 0.0431 | 0.0502 | 0.0574 | 0.0647 |
|             | 2                            | 8      | 6      | 4      | 4      | 3      | 8      | 6      | 7      | 9      |        |
| 19          |                              | 0.0052 | 0.0115 | 0.0182 | 0.0253 | 0.0326 | 0.0401 | 0.0478 | 0.0557 | 0.0636 | 0.0718 |
|             | 3                            | 0      | 4      | 1      | 3      | 5      | 5      | 0      | 9      | 0      |        |
| 20          |                              | 0.0057 | 0.0126 | 0.0201 | 0.0279 | 0.0359 | 0.0442 | 0.0527 | 0.0614 | 0.0702 | 0.0791 |
|             | 6                            | 8      | 1      | 0      | 7      | 6      | 5      | 0      | 1      | 5      |        |
| 21          |                              | 0.0063 | 0.0139 | 0.0220 | 0.0306 | 0.0394 | 0.0485 | 0.0578 | 0.0673 | 0.0770 | 0.0868 |
|             | 2                            | 1      | 6      | 1      | 6      | 6      | 7      | 7      | 3      | 4      |        |
| 22          |                              | 0.0069 | 0.0151 | 0.0241 | 0.0334 | 0.0431 | 0.0530 | 0.0632 | 0.0735 | 0.0841 | 0.0948 |
|             | 0                            | 9      | 0      | 4      | 1      | 5      | 2      | 9      | 5      | 7      |        |
| 23          |                              | 0.0075 | 0.0165 | 0.0262 | 0.0363 | 0.0469 | 0.0577 | 0.0687 | 0.0800 | 0.0915 | 0.1032 |
|             | 1                            | 3      | 3      | 9      | 1      | 2      | 9      | 8      | 6      | 3      |        |
| 24          |                              | 0.0081 | 0.0179 | 0.0284 | 0.0394 | 0.0508 | 0.0625 | 0.0745 | 0.0868 | 0.0992 | 0.1119 |
|             | 5                            | 3      | 4      | 5      | 6      | 8      | 8      | 2      | 8      | 2      |        |
| 25          |                              | 0.0088 | 0.0193 | 0.0307 | 0.0426 | 0.0549 | 0.0676 | 0.0806 | 0.0938 | 0.1072 | 0.1209 |
|             | 0                            | 7      | 3      | 3      | 6      | 3      | 0      | 2      | 8      | 5      |        |
| 26          |                              | 0.0094 | 0.0208 | 0.0331 | 0.0459 | 0.0592 | 0.0728 | 0.0868 | 0.1010 | 0.1155 | 0.1303 |
|             | 8                            | 7      | 1      | 3      | 1      | 6      | 3      | 8      | 8      | 1      |        |
| 27          |                              | 0.0101 | 0.0224 | 0.0355 | 0.0493 | 0.0636 | 0.0782 | 0.0932 | 0.1086 | 0.1241 | 0.1399 |
|             | 9                            | 2      | 7      | 5      | 1      | 8      | 9      | 0      | 7      | 9      |        |
| 28          |                              | 0.0109 | 0.0240 | 0.0381 | 0.0528 | 0.0681 | 0.0838 | 0.0999 | 0.1163 | 0.1330 | 0.1500 |
|             | 2                            | 3      | 1      | 8      | 6      | 8      | 6      | 7      | 6      | 1      |        |

|   |        |        |        |        |        |        |        |        |        |        |
|---|--------|--------|--------|--------|--------|--------|--------|--------|--------|--------|
| 2 | 0.0116 | 0.0256 | 0.0407 | 0.0565 | 0.0728 | 0.0896 | 0.1068 | 0.1243 | 0.1422 | 0.1603 |
| 9 | 7      | 8      | 4      | 2      | 6      | 6      | 5      | 9      | 3      | 5      |
| 3 | 0.0124 | 0.0273 | 0.0434 | 0.0602 | 0.0777 | 0.0956 | 0.1139 | 0.1326 | 0.1517 | 0.1710 |
| 0 | 5      | 9      | 5      | 8      | 1      | 3      | 6      | 7      | 0      | 2      |
| 3 | 0.0132 | 0.0291 | 0.0462 | 0.0641 | 0.0827 | 0.1017 | 0.1212 | 0.1411 | 0.1614 | 0.1820 |
| 1 | 5      | 5      | 5      | 6      | 0      | 7      | 9      | 9      | 5      | 1      |
| 3 | 0.0140 | 0.0309 | 0.0491 | 0.0681 | 0.0878 | 0.1081 | 0.1288 | 0.1499 | 0.1714 | 0.1933 |
| 2 | 7      | 7      | 2      | 5      | 5      | 0      | 3      | 7      | 9      | 3      |
| 3 | 0.0149 | 0.0328 | 0.0520 | 0.0722 | 0.0931 | 0.1146 | 0.1365 | 0.1590 | 0.1818 | 0.2049 |
| 3 | 2      | 3      | 8      | 5      | 4      | 1      | 9      | 0      | 1      | 7      |

*Cont.*

| <div> <div>H (m)</div> <div>V (m<sup>3</sup>)</div> <div>DBH (cm)</div> </div> | 11      | 12      | 13      | 14      | 15      | 16      | 17      | 18      | 19      | 20      |
|--------------------------------------------------------------------------------|---------|---------|---------|---------|---------|---------|---------|---------|---------|---------|
| 5                                                                              | 0.00633 | 0.00699 | 0.00766 | 0.00833 | 0.00901 | 0.00970 | 0.01039 | 0.01109 | 0.01180 | 0.01251 |
| 6                                                                              | 0.00896 | 0.00989 | 0.01083 | 0.01178 | 0.01275 | 0.01372 | 0.01470 | 0.01569 | 0.01668 | 0.01768 |
| 7                                                                              | 0.01200 | 0.01325 | 0.01452 | 0.01579 | 0.01708 | 0.01839 | 0.01970 | 0.02102 | 0.02236 | 0.02370 |
| 8                                                                              | 0.01547 | 0.01708 | 0.01871 | 0.02036 | 0.02202 | 0.02370 | 0.02539 | 0.02709 | 0.02881 | 0.03055 |
| 9                                                                              | 0.01935 | 0.02136 | 0.02340 | 0.02546 | 0.02754 | 0.02964 | 0.03176 | 0.03389 | 0.03604 | 0.03821 |
| 10                                                                             | 0.02364 | 0.02610 | 0.02859 | 0.03110 | 0.03364 | 0.03621 | 0.03879 | 0.04140 | 0.04403 | 0.04668 |
| 11                                                                             | 0.02833 | 0.03128 | 0.03426 | 0.03728 | 0.04032 | 0.04340 | 0.04650 | 0.04962 | 0.05277 | 0.05594 |
| 12                                                                             | 0.03342 | 0.03690 | 0.04042 | 0.04398 | 0.04757 | 0.05120 | 0.05485 | 0.05854 | 0.06226 | 0.06600 |
| 13                                                                             | 0.03891 | 0.04297 | 0.04706 | 0.05120 | 0.05539 | 0.05961 | 0.06386 | 0.06816 | 0.07248 | 0.07684 |
| 14                                                                             | 0.04480 | 0.04946 | 0.05418 | 0.05895 | 0.06376 | 0.06862 | 0.07352 | 0.07846 | 0.08344 | 0.08846 |
| 15                                                                             | 0.05107 | 0.05639 | 0.06177 | 0.06720 | 0.07269 | 0.07823 | 0.08382 | 0.08945 | 0.09513 | 0.10085 |
| 16                                                                             | 0.05774 | 0.06375 | 0.06982 | 0.07597 | 0.08217 | 0.08844 | 0.09475 | 0.10112 | 0.10754 | 0.11400 |
| 17                                                                             | 0.06478 | 0.07153 | 0.07835 | 0.08524 | 0.09221 | 0.09923 | 0.10632 | 0.11347 | 0.12067 | 0.12792 |
| 18                                                                             | 0.07222 | 0.07973 | 0.08734 | 0.09502 | 0.10278 | 0.11062 | 0.11852 | 0.12648 | 0.13451 | 0.14260 |
| 19                                                                             | 0.08003 | 0.08836 | 0.09679 | 0.10530 | 0.11390 | 0.12258 | 0.13134 | 0.14017 | 0.14906 | 0.15802 |
| 20                                                                             | 0.08822 | 0.09740 | 0.10669 | 0.11608 | 0.12556 | 0.13513 | 0.14478 | 0.15452 | 0.16432 | 0.17420 |
| 21                                                                             | 0.09679 | 0.10687 | 0.11706 | 0.12736 | 0.13776 | 0.14826 | 0.15885 | 0.16952 | 0.18028 | 0.19112 |
| 22                                                                             | 0.10574 | 0.11674 | 0.12787 | 0.13913 | 0.15049 | 0.16196 | 0.17353 | 0.18519 | 0.19694 | 0.20878 |
| 23                                                                             | 0.11505 | 0.12703 | 0.13914 | 0.15139 | 0.16375 | 0.17623 | 0.18882 | 0.20151 | 0.21430 | 0.22718 |
| 24                                                                             | 0.12474 | 0.13773 | 0.15086 | 0.16414 | 0.17754 | 0.19108 | 0.20472 | 0.21848 | 0.23235 | 0.24631 |
| 25                                                                             | 0.13480 | 0.14884 | 0.16303 | 0.17738 | 0.19186 | 0.20649 | 0.22123 | 0.23610 | 0.25109 | 0.26618 |
| 26                                                                             | 0.14523 | 0.16035 | 0.17564 | 0.19110 | 0.20671 | 0.22246 | 0.23835 | 0.25437 | 0.27051 | 0.28677 |
| 27                                                                             | 0.15603 | 0.17227 | 0.18870 | 0.20530 | 0.22207 | 0.23900 | 0.25607 | 0.27328 | 0.29062 | 0.30809 |
| 28                                                                             | 0.16719 | 0.18460 | 0.20220 | 0.21999 | 0.23796 | 0.25610 | 0.27439 | 0.29283 | 0.31141 | 0.33013 |
| 29                                                                             | 0.17872 | 0.19732 | 0.21614 | 0.23516 | 0.25437 | 0.27375 | 0.29331 | 0.31302 | 0.33288 | 0.35289 |
| 30                                                                             | 0.19061 | 0.21045 | 0.23052 | 0.25081 | 0.27129 | 0.29197 | 0.31282 | 0.33385 | 0.35503 | 0.37637 |
| 31                                                                             | 0.20286 | 0.22398 | 0.24534 | 0.26693 | 0.28873 | 0.31073 | 0.33293 | 0.35531 | 0.37785 | 0.40057 |
| 32                                                                             | 0.21548 | 0.23791 | 0.26060 | 0.28353 | 0.30668 | 0.33006 | 0.35363 | 0.37740 | 0.40135 | 0.42547 |
| 33                                                                             | 0.22845 | 0.25223 | 0.27629 | 0.30060 | 0.32515 | 0.34993 | 0.37492 | 0.40012 | 0.42551 | 0.45109 |

*Cont.*

| <div> <div>H (m)</div> <div>V (m<sup>3</sup>)</div> <div>DBH (cm)</div> </div> | 21      | 22      | 23      | 24      | 25      | 26      | 27      | 28      | 29      | 30      |
|--------------------------------------------------------------------------------|---------|---------|---------|---------|---------|---------|---------|---------|---------|---------|
| 5                                                                              | 0.01322 | 0.01394 | 0.01466 | 0.01539 | 0.01612 | 0.01686 | 0.01760 | 0.01834 | 0.01909 | 0.01984 |
| 6                                                                              | 0.01869 | 0.01971 | 0.02073 | 0.02176 | 0.02280 | 0.02384 | 0.02488 | 0.02593 | 0.02699 | 0.02805 |
| 7                                                                              | 0.02505 | 0.02642 | 0.02779 | 0.02917 | 0.03055 | 0.03195 | 0.03335 | 0.03476 | 0.03618 | 0.03760 |
| 8                                                                              | 0.03229 | 0.03405 | 0.03581 | 0.03759 | 0.03938 | 0.04117 | 0.04298 | 0.04480 | 0.04662 | 0.04846 |
| 9                                                                              | 0.04039 | 0.04258 | 0.04479 | 0.04702 | 0.04925 | 0.05150 | 0.05376 | 0.05603 | 0.05832 | 0.06061 |
| 10                                                                             | 0.04934 | 0.05202 | 0.05472 | 0.05744 | 0.06017 | 0.06291 | 0.06568 | 0.06845 | 0.07124 | 0.07404 |
| 11                                                                             | 0.05914 | 0.06235 | 0.06559 | 0.06884 | 0.07211 | 0.07541 | 0.07871 | 0.08204 | 0.08538 | 0.08874 |
| 12                                                                             | 0.06977 | 0.07356 | 0.07738 | 0.08122 | 0.08508 | 0.08896 | 0.09286 | 0.09679 | 0.10073 | 0.10469 |
| 13                                                                             | 0.08123 | 0.08564 | 0.09009 | 0.09456 | 0.09905 | 0.10357 | 0.10812 | 0.11269 | 0.11728 | 0.12189 |
| 14                                                                             | 0.09351 | 0.09859 | 0.10371 | 0.10885 | 0.11403 | 0.11923 | 0.12447 | 0.12972 | 0.13501 | 0.14032 |
| 15                                                                             | 0.10660 | 0.11240 | 0.11823 | 0.12410 | 0.13000 | 0.13593 | 0.14190 | 0.14790 | 0.15392 | 0.15997 |
| 16                                                                             | 0.12051 | 0.12706 | 0.13366 | 0.14029 | 0.14696 | 0.15367 | 0.16041 | 0.16719 | 0.17400 | 0.18084 |
| 17                                                                             | 0.13522 | 0.14258 | 0.14997 | 0.15742 | 0.16490 | 0.17243 | 0.17999 | 0.18760 | 0.19524 | 0.20292 |
| 18                                                                             | 0.15074 | 0.15893 | 0.16718 | 0.17547 | 0.18382 | 0.19221 | 0.20064 | 0.20912 | 0.21764 | 0.22620 |
| 19                                                                             | 0.16704 | 0.17613 | 0.18526 | 0.19446 | 0.20371 | 0.21300 | 0.22235 | 0.23175 | 0.24119 | 0.25067 |
| 20                                                                             | 0.18414 | 0.19415 | 0.20423 | 0.21436 | 0.22456 | 0.23481 | 0.24511 | 0.25547 | 0.26588 | 0.27633 |
| 21                                                                             | 0.20203 | 0.21301 | 0.22407 | 0.23519 | 0.24637 | 0.25761 | 0.26892 | 0.28028 | 0.29170 | 0.30318 |
| 22                                                                             | 0.22070 | 0.23270 | 0.24477 | 0.25692 | 0.26914 | 0.28142 | 0.29377 | 0.30618 | 0.31866 | 0.33119 |
| 23                                                                             | 0.24015 | 0.25321 | 0.26634 | 0.27956 | 0.29286 | 0.30622 | 0.31966 | 0.33317 | 0.34674 | 0.36038 |
| 24                                                                             | 0.26038 | 0.27453 | 0.28878 | 0.30311 | 0.31752 | 0.33201 | 0.34658 | 0.36123 | 0.37595 | 0.39073 |
| 25                                                                             | 0.28138 | 0.29667 | 0.31207 | 0.32755 | 0.34313 | 0.35879 | 0.37453 | 0.39036 | 0.40626 | 0.42224 |
| 26                                                                             | 0.30314 | 0.31963 | 0.33621 | 0.35289 | 0.36967 | 0.38655 | 0.40351 | 0.42056 | 0.43770 | 0.45491 |
| 27                                                                             | 0.32568 | 0.34339 | 0.36120 | 0.37913 | 0.39716 | 0.41528 | 0.43351 | 0.45183 | 0.47023 | 0.48873 |
| 28                                                                             | 0.34898 | 0.36795 | 0.38704 | 0.40625 | 0.42557 | 0.44499 | 0.46452 | 0.48415 | 0.50388 | 0.52370 |
| 29                                                                             | 0.37304 | 0.39332 | 0.41373 | 0.43426 | 0.45491 | 0.47567 | 0.49655 | 0.51753 | 0.53862 | 0.55980 |
| 30                                                                             | 0.39786 | 0.41949 | 0.44126 | 0.46315 | 0.48518 | 0.50732 | 0.52959 | 0.55196 | 0.57445 | 0.59705 |
| 31                                                                             | 0.42344 | 0.44646 | 0.46962 | 0.49293 | 0.51637 | 0.53993 | 0.56363 | 0.58745 | 0.61138 | 0.63543 |
| 32                                                                             | 0.44976 | 0.47422 | 0.49882 | 0.52358 | 0.54847 | 0.57351 | 0.59868 | 0.62397 | 0.64939 | 0.67494 |
| 33                                                                             | 0.47684 | 0.50277 | 0.52886 | 0.55510 | 0.58150 | 0.60804 | 0.63472 | 0.66154 | 0.68849 | 0.71557 |

**Table S2.** Poplar standard volume table compiled by standard volume equation.

| <div> <div>H (m)</div> <div>V (m<sup>3</sup>)</div> <div>DBH (cm)</div> </div> | 1       | 2       | 3       | 4       | 5       | 6       | 7       | 8       | 9       | 10      |
|--------------------------------------------------------------------------------|---------|---------|---------|---------|---------|---------|---------|---------|---------|---------|
| 5                                                                              | 0.00092 | 0.00169 | 0.00240 | 0.00308 | 0.00374 | 0.00439 | 0.00501 | 0.00563 | 0.00624 | 0.00684 |
| 6                                                                              | 0.00130 | 0.00238 | 0.00339 | 0.00436 | 0.00529 | 0.00620 | 0.00709 | 0.00797 | 0.00883 | 0.00967 |
| 7                                                                              | 0.00175 | 0.00320 | 0.00455 | 0.00584 | 0.00709 | 0.00831 | 0.00951 | 0.01068 | 0.01183 | 0.01297 |
| 8                                                                              | 0.00225 | 0.00412 | 0.00586 | 0.00753 | 0.00914 | 0.01072 | 0.01225 | 0.01376 | 0.01525 | 0.01671 |

|    |         |         |         |         |         |         |         |         |         |         |
|----|---------|---------|---------|---------|---------|---------|---------|---------|---------|---------|
| 9  | 0.00282 | 0.00515 | 0.00733 | 0.00942 | 0.01144 | 0.01341 | 0.01533 | 0.01722 | 0.01908 | 0.02091 |
| 10 | 0.00345 | 0.00630 | 0.00896 | 0.01151 | 0.01398 | 0.01638 | 0.01873 | 0.02104 | 0.02331 | 0.02554 |
| 11 | 0.00413 | 0.00755 | 0.01074 | 0.01380 | 0.01675 | 0.01963 | 0.02245 | 0.02521 | 0.02793 | 0.03062 |
| 12 | 0.00487 | 0.00891 | 0.01267 | 0.01628 | 0.01976 | 0.02316 | 0.02649 | 0.02975 | 0.03296 | 0.03612 |
| 13 | 0.00567 | 0.01037 | 0.01476 | 0.01895 | 0.02301 | 0.02697 | 0.03084 | 0.03464 | 0.03838 | 0.04206 |
| 14 | 0.00653 | 0.01194 | 0.01699 | 0.02182 | 0.02649 | 0.03105 | 0.03550 | 0.03988 | 0.04418 | 0.04842 |
| 15 | 0.00745 | 0.01361 | 0.01937 | 0.02488 | 0.03021 | 0.03540 | 0.04048 | 0.04547 | 0.05037 | 0.05521 |
| 16 | 0.00842 | 0.01539 | 0.02190 | 0.02812 | 0.03415 | 0.04002 | 0.04576 | 0.05140 | 0.05695 | 0.06242 |
| 17 | 0.00945 | 0.01727 | 0.02457 | 0.03156 | 0.03832 | 0.04491 | 0.05135 | 0.05768 | 0.06391 | 0.07004 |
| 18 | 0.01053 | 0.01925 | 0.02739 | 0.03518 | 0.04272 | 0.05006 | 0.05725 | 0.06430 | 0.07124 | 0.07808 |
| 19 | 0.01167 | 0.02133 | 0.03036 | 0.03899 | 0.04735 | 0.05548 | 0.06345 | 0.07126 | 0.07895 | 0.08653 |
| 20 | 0.01287 | 0.02352 | 0.03347 | 0.04298 | 0.05219 | 0.06117 | 0.06995 | 0.07856 | 0.08704 | 0.09539 |
| 21 | 0.01412 | 0.02580 | 0.03672 | 0.04716 | 0.05727 | 0.06711 | 0.07674 | 0.08620 | 0.09550 | 0.10467 |
| 22 | 0.01542 | 0.02819 | 0.04011 | 0.05152 | 0.06256 | 0.07332 | 0.08384 | 0.09417 | 0.10433 | 0.11434 |
| 23 | 0.01678 | 0.03068 | 0.04365 | 0.05607 | 0.06808 | 0.07978 | 0.09123 | 0.10247 | 0.11353 | 0.12443 |
| 24 | 0.01820 | 0.03326 | 0.04733 | 0.06079 | 0.07382 | 0.08650 | 0.09892 | 0.11110 | 0.12309 | 0.13491 |
| 25 | 0.01967 | 0.03595 | 0.05115 | 0.06570 | 0.07977 | 0.09348 | 0.10690 | 0.12007 | 0.13303 | 0.14580 |
| 26 | 0.02119 | 0.03873 | 0.05511 | 0.07078 | 0.08595 | 0.10072 | 0.11518 | 0.12936 | 0.14332 | 0.15708 |
| 27 | 0.02277 | 0.04161 | 0.05921 | 0.07605 | 0.09234 | 0.10821 | 0.12374 | 0.13899 | 0.15398 | 0.16877 |
| 28 | 0.02440 | 0.04459 | 0.06345 | 0.08149 | 0.09895 | 0.11596 | 0.13260 | 0.14894 | 0.16501 | 0.18085 |
| 29 | 0.02608 | 0.04766 | 0.06782 | 0.08711 | 0.10578 | 0.12396 | 0.14175 | 0.15921 | 0.17639 | 0.19332 |
| 30 | 0.02781 | 0.05084 | 0.07234 | 0.09291 | 0.11282 | 0.13221 | 0.15118 | 0.16981 | 0.18813 | 0.20619 |
| 31 | 0.02960 | 0.05411 | 0.07699 | 0.09889 | 0.12007 | 0.14071 | 0.16091 | 0.18073 | 0.20023 | 0.21945 |
| 32 | 0.03145 | 0.05747 | 0.08178 | 0.10504 | 0.12754 | 0.14947 | 0.17092 | 0.19197 | 0.21269 | 0.23311 |
| 33 | 0.03334 | 0.06093 | 0.08671 | 0.11137 | 0.13523 | 0.15847 | 0.18121 | 0.20354 | 0.22550 | 0.24715 |

*Cont.*

| <div><div><div>H (m)</div><div>V (m³)</div><div>DBH (cm)</div></div></div> |        |        |        |        |        |        |        |        |        |        |
|----------------------------------------------------------------------------|--------|--------|--------|--------|--------|--------|--------|--------|--------|--------|
|                                                                            | 11     | 12     | 13     | 14     | 15     | 16     | 17     | 18     | 19     | 20     |
| 5                                                                          | 0.0074 | 0.0080 | 0.0085 | 0.0091 | 0.0097 | 0.0102 | 0.0108 | 0.0114 | 0.0119 | 0.0125 |
|                                                                            | 3      | 1      | 9      | 7      | 3      | 9      | 5      | 0      | 5      | 0      |
| 6                                                                          | 0.0105 | 0.0113 | 0.0121 | 0.0129 | 0.0137 | 0.0145 | 0.0153 | 0.0161 | 0.0169 | 0.0176 |
|                                                                            | 1      | 3      | 5      | 6      | 6      | 6      | 5      | 3      | 1      | 8      |
| 7                                                                          | 0.0140 | 0.0151 | 0.0162 | 0.0173 | 0.0184 | 0.0195 | 0.0205 | 0.0216 | 0.0226 | 0.0237 |
|                                                                            | 9      | 9      | 9      | 8      | 5      | 2      | 7      | 2      | 6      | 0      |
| 8                                                                          | 0.0181 | 0.0195 | 0.0210 | 0.0224 | 0.0237 | 0.0251 | 0.0265 | 0.0278 | 0.0292 | 0.0305 |
|                                                                            | 6      | 9      | 0      | 0      | 8      | 5      | 2      | 7      | 1      | 4      |
| 9                                                                          | 0.0227 | 0.0245 | 0.0262 | 0.0280 | 0.0297 | 0.0314 | 0.0331 | 0.0348 | 0.0365 | 0.0382 |
|                                                                            | 1      | 0      | 7      | 2      | 5      | 7      | 7      | 6      | 4      | 1      |
| 10                                                                         | 0.0277 | 0.0299 | 0.0320 | 0.0342 | 0.0363 | 0.0384 | 0.0405 | 0.0425 | 0.0446 | 0.0466 |
|                                                                            | 5      | 3      | 9      | 3      | 5      | 5      | 3      | 9      | 5      | 8      |
| 11                                                                         | 0.0332 | 0.0358 | 0.0384 | 0.0410 | 0.0435 | 0.0460 | 0.0485 | 0.0510 | 0.0535 | 0.0559 |
|                                                                            | 6      | 8      | 7      | 3      | 7      | 8      | 8      | 5      | 1      | 6      |
| 12                                                                         | 0.0392 | 0.0423 | 0.0453 | 0.0484 | 0.0514 | 0.0543 | 0.0573 | 0.0602 | 0.0631 | 0.0660 |
|                                                                            | 5      | 3      | 9      | 1      | 0      | 7      | 2      | 4      | 4      | 2      |
| 13                                                                         | 0.0457 | 0.0492 | 0.0528 | 0.0563 | 0.0598 | 0.0633 | 0.0667 | 0.0701 | 0.0735 | 0.0768 |
|                                                                            | 0      | 9      | 4      | 6      | 5      | 1      | 4      | 4      | 2      | 7      |
| 14                                                                         | 0.0526 | 0.0567 | 0.0608 | 0.0648 | 0.0689 | 0.0728 | 0.0768 | 0.0807 | 0.0846 | 0.0885 |
|                                                                            | 1      | 5      | 4      | 9      | 1      | 8      | 3      | 5      | 4      | 0      |
| 15                                                                         | 0.0599 | 0.0647 | 0.0693 | 0.0739 | 0.0785 | 0.0831 | 0.0876 | 0.0920 | 0.0965 | 0.1009 |
|                                                                            | 8      | 0      | 7      | 9      | 6      | 0      | 0      | 7      | 0      | 0      |

|    |             |             |             |             |             |             |             |             |             |             |
|----|-------------|-------------|-------------|-------------|-------------|-------------|-------------|-------------|-------------|-------------|
| 16 | 0.0678<br>1 | 0.0731<br>4 | 0.0784<br>2 | 0.0836<br>4 | 0.0888<br>2 | 0.0939<br>5 | 0.0990<br>3 | 0.1040<br>8 | 0.1091<br>0 | 0.1140<br>8 |
| 17 | 0.0761<br>0 | 0.0820<br>8 | 0.0880<br>0 | 0.0938<br>6 | 0.0996<br>7 | 0.1054<br>2 | 0.1111<br>3 | 0.1168<br>0 | 0.1224<br>2 | 0.1280<br>1 |
| 18 | 0.0848<br>3 | 0.0915<br>0 | 0.0981<br>0 | 0.1046<br>3 | 0.1111<br>1 | 0.1175<br>2 | 0.1238<br>9 | 0.1302<br>0 | 0.1364<br>7 | 0.1427<br>0 |
| 19 | 0.0940<br>1 | 0.1014<br>1 | 0.1087<br>2 | 0.1159<br>6 | 0.1231<br>3 | 0.1302<br>4 | 0.1373<br>0 | 0.1443<br>0 | 0.1512<br>5 | 0.1581<br>5 |
| 20 | 0.1036<br>4 | 0.1117<br>9 | 0.1198<br>5 | 0.1278<br>4 | 0.1357<br>4 | 0.1435<br>8 | 0.1513<br>6 | 0.1590<br>8 | 0.1667<br>4 | 0.1743<br>5 |
| 21 | 0.1137<br>1 | 0.1226<br>6 | 0.1315<br>0 | 0.1402<br>6 | 0.1489<br>4 | 0.1575<br>4 | 0.1660<br>7 | 0.1745<br>4 | 0.1829<br>4 | 0.1912<br>9 |
| 22 | 0.1242<br>3 | 0.1340<br>0 | 0.1436<br>6 | 0.1532<br>3 | 0.1627<br>1 | 0.1721<br>0 | 0.1814<br>3 | 0.1906<br>8 | 0.1998<br>6 | 0.2089<br>8 |
| 23 | 0.1351<br>8 | 0.1458<br>1 | 0.1563<br>3 | 0.1667<br>4 | 0.1770<br>5 | 0.1872<br>8 | 0.1974<br>2 | 0.2074<br>9 | 0.2174<br>8 | 0.2274<br>1 |
| 24 | 0.1465<br>7 | 0.1581<br>0 | 0.1695<br>0 | 0.1807<br>9 | 0.1919<br>7 | 0.2030<br>6 | 0.2140<br>6 | 0.2249<br>7 | 0.2358<br>1 | 0.2465<br>7 |
| 25 | 0.1584<br>0 | 0.1708<br>6 | 0.1831<br>8 | 0.1953<br>8 | 0.2074<br>7 | 0.2194<br>5 | 0.2313<br>3 | 0.2431<br>3 | 0.2548<br>4 | 0.2664<br>7 |
| 26 | 0.1706<br>6 | 0.1840<br>8 | 0.1973<br>6 | 0.2105<br>0 | 0.2235<br>3 | 0.2364<br>4 | 0.2492<br>4 | 0.2619<br>5 | 0.2745<br>6 | 0.2870<br>9 |
| 27 | 0.1833<br>6 | 0.1977<br>8 | 0.2120<br>4 | 0.2261<br>6 | 0.2401<br>5 | 0.2540<br>2 | 0.2677<br>8 | 0.2814<br>3 | 0.2949<br>9 | 0.3084<br>5 |
| 28 | 0.1964<br>8 | 0.2119<br>3 | 0.2272<br>2 | 0.2423<br>5 | 0.2573<br>4 | 0.2722<br>0 | 0.2869<br>5 | 0.3015<br>8 | 0.3161<br>0 | 0.3305<br>3 |
| 29 | 0.2100<br>4 | 0.2265<br>5 | 0.2428<br>9 | 0.2590<br>7 | 0.2750<br>9 | 0.2909<br>8 | 0.3067<br>4 | 0.3223<br>8 | 0.3379<br>1 | 0.3533<br>3 |
| 30 | 0.2240<br>2 | 0.2416<br>3 | 0.2590<br>6 | 0.2763<br>1 | 0.2934<br>1 | 0.3103<br>5 | 0.3271<br>6 | 0.3438<br>4 | 0.3604<br>0 | 0.3768<br>5 |
| 31 | 0.2384<br>3 | 0.2571<br>8 | 0.2757<br>2 | 0.2940<br>9 | 0.3122<br>8 | 0.3303<br>1 | 0.3482<br>0 | 0.3659<br>6 | 0.3835<br>8 | 0.4010<br>9 |
| 32 | 0.2532<br>6 | 0.2731<br>8 | 0.2928<br>8 | 0.3123<br>8 | 0.3317<br>1 | 0.3508<br>6 | 0.3698<br>7 | 0.3887<br>2 | 0.4074<br>5 | 0.4260<br>4 |
| 33 | 0.2685<br>2 | 0.2896<br>3 | 0.3105<br>2 | 0.3312<br>0 | 0.3516<br>9 | 0.3720<br>0 | 0.3921<br>5 | 0.4121<br>4 | 0.4319<br>9 | 0.4517<br>0 |

Cont.

|          | H (m)   | 11      |         | 22      | 23      | 24      | 25      | 26      | 27      | 28      | 29 | 30 |
|----------|---------|---------|---------|---------|---------|---------|---------|---------|---------|---------|----|----|
|          | V (m³)  |         |         |         |         |         |         |         |         |         |    |    |
| DBH (cm) |         |         |         |         |         |         |         |         |         |         |    |    |
| 5        | 0.01304 | 0.01358 | 0.01412 | 0.01465 | 0.01518 | 0.01570 | 0.01623 | 0.01675 | 0.01727 | 0.01779 |    |    |
| 6        | 0.01844 | 0.01921 | 0.01996 | 0.02072 | 0.02147 | 0.02221 | 0.02295 | 0.02369 | 0.02442 | 0.02516 |    |    |
| 7        | 0.02472 | 0.02575 | 0.02676 | 0.02777 | 0.02877 | 0.02977 | 0.03077 | 0.03176 | 0.03274 | 0.03372 |    |    |
| 8        | 0.03187 | 0.03319 | 0.03449 | 0.03579 | 0.03709 | 0.03838 | 0.03966 | 0.04093 | 0.04220 | 0.04346 |    |    |
| 9        | 0.03987 | 0.04151 | 0.04315 | 0.04478 | 0.04640 | 0.04801 | 0.04961 | 0.05120 | 0.05279 | 0.05437 |    |    |
| 10       | 0.04871 | 0.05072 | 0.05272 | 0.05471 | 0.05669 | 0.05865 | 0.06061 | 0.06256 | 0.06450 | 0.06643 |    |    |
| 11       | 0.05838 | 0.06079 | 0.06319 | 0.06557 | 0.06795 | 0.07030 | 0.07265 | 0.07499 | 0.07731 | 0.07962 |    |    |
| 12       | 0.06888 | 0.07173 | 0.07456 | 0.07737 | 0.08017 | 0.08295 | 0.08572 | 0.08847 | 0.09122 | 0.09395 |    |    |
| 13       | 0.08020 | 0.08352 | 0.08681 | 0.09009 | 0.09334 | 0.09658 | 0.09981 | 0.10301 | 0.10621 | 0.10939 |    |    |
| 14       | 0.09234 | 0.09615 | 0.09994 | 0.10371 | 0.10746 | 0.11119 | 0.11491 | 0.11860 | 0.12228 | 0.12594 |    |    |
| 15       | 0.10528 | 0.10963 | 0.11395 | 0.11825 | 0.12252 | 0.12678 | 0.13101 | 0.13522 | 0.13941 | 0.14358 |    |    |
| 16       | 0.11902 | 0.12394 | 0.12882 | 0.13368 | 0.13852 | 0.14333 | 0.14811 | 0.15287 | 0.15761 | 0.16233 |    |    |
| 17       | 0.13356 | 0.13908 | 0.14456 | 0.15001 | 0.15544 | 0.16083 | 0.16620 | 0.17154 | 0.17686 | 0.18216 |    |    |

|    |         |         |         |         |         |         |         |         |         |         |
|----|---------|---------|---------|---------|---------|---------|---------|---------|---------|---------|
| 18 | 0.14889 | 0.15504 | 0.16115 | 0.16723 | 0.17328 | 0.17929 | 0.18528 | 0.19123 | 0.19716 | 0.20306 |
| 19 | 0.16501 | 0.17182 | 0.17860 | 0.18534 | 0.19204 | 0.19870 | 0.20533 | 0.21193 | 0.21850 | 0.22505 |
| 20 | 0.18191 | 0.18942 | 0.19689 | 0.20432 | 0.21170 | 0.21905 | 0.22636 | 0.23364 | 0.24088 | 0.24809 |
| 21 | 0.19959 | 0.20783 | 0.21603 | 0.22417 | 0.23228 | 0.24034 | 0.24836 | 0.25635 | 0.26429 | 0.27221 |
| 22 | 0.21804 | 0.22705 | 0.23600 | 0.24490 | 0.25376 | 0.26256 | 0.27133 | 0.28005 | 0.28873 | 0.29738 |
| 23 | 0.23727 | 0.24707 | 0.25681 | 0.26650 | 0.27613 | 0.28572 | 0.29525 | 0.30474 | 0.31419 | 0.32360 |
| 24 | 0.25726 | 0.26789 | 0.27845 | 0.28895 | 0.29940 | 0.30979 | 0.32013 | 0.33042 | 0.34067 | 0.35087 |
| 25 | 0.27802 | 0.28950 | 0.30092 | 0.31227 | 0.32356 | 0.33479 | 0.34597 | 0.35709 | 0.36816 | 0.37918 |
| 26 | 0.29954 | 0.31191 | 0.32421 | 0.33644 | 0.34861 | 0.36071 | 0.37275 | 0.38473 | 0.39666 | 0.40853 |
| 27 | 0.32182 | 0.33511 | 0.34833 | 0.36147 | 0.37454 | 0.38754 | 0.40047 | 0.41335 | 0.42616 | 0.43892 |
| 28 | 0.34486 | 0.35910 | 0.37326 | 0.38734 | 0.40135 | 0.41528 | 0.42914 | 0.44293 | 0.45666 | 0.47033 |
| 29 | 0.36865 | 0.38387 | 0.39901 | 0.41406 | 0.42903 | 0.44392 | 0.45874 | 0.47349 | 0.48817 | 0.50278 |
| 30 | 0.39319 | 0.40943 | 0.42557 | 0.44163 | 0.45759 | 0.47348 | 0.48928 | 0.50501 | 0.52066 | 0.53625 |
| 31 | 0.41848 | 0.43576 | 0.45294 | 0.47003 | 0.48702 | 0.50393 | 0.52075 | 0.53749 | 0.55415 | 0.57074 |
| 32 | 0.44451 | 0.46287 | 0.48112 | 0.49927 | 0.51732 | 0.53528 | 0.55315 | 0.57093 | 0.58863 | 0.60625 |
| 33 | 0.47129 | 0.49076 | 0.51011 | 0.52935 | 0.54849 | 0.56753 | 0.58647 | 0.60532 | 0.62409 | 0.64277 |

---
